# Supplementary material for: Lifespan-extending caloric restriction or mTOR inhibition impair adaptive immunity of old mice by distinct mechanisms
Source: PubMed Central journal article supplement (PMC4326902; doi:10.1111/acel.12280), 2014-11-26

# Supplemental Figure 1

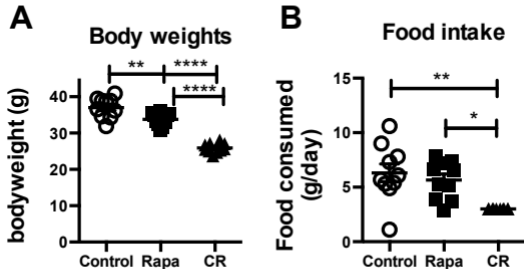

# Supplemental Figure 2

## Serum Testosterone

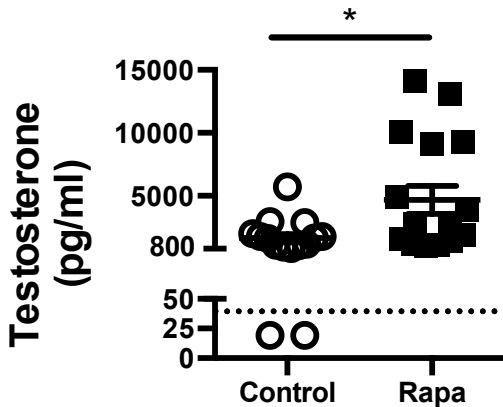

# Supplemental Figure 3

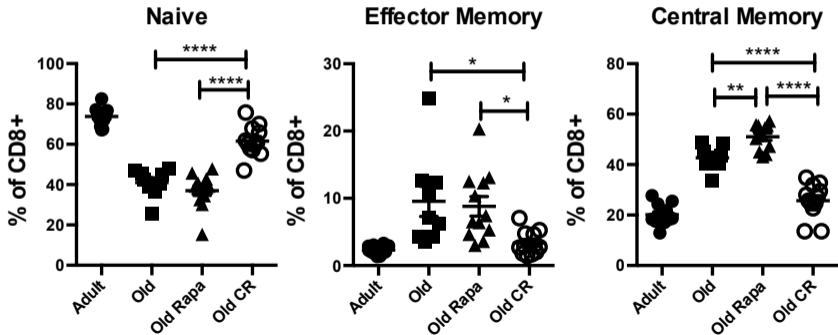

# Supplemental Figure 4

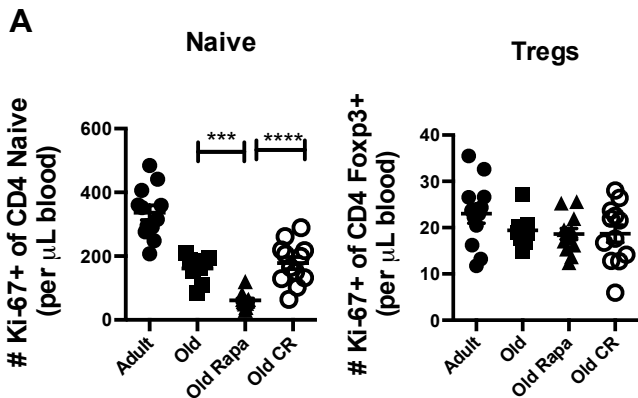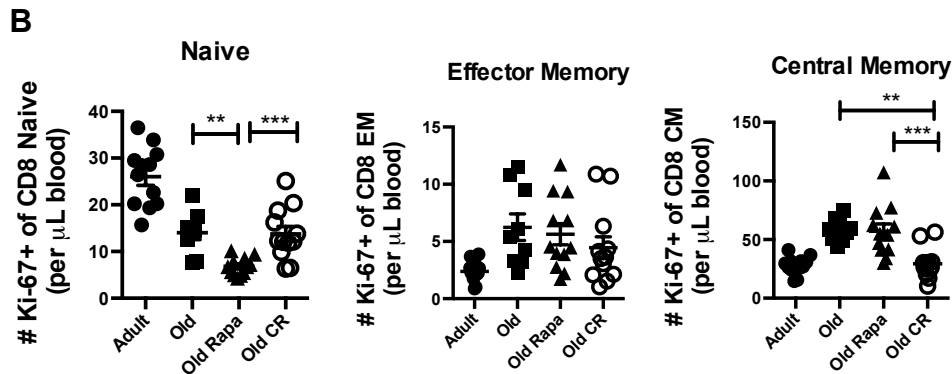

Supplement: acel0014-0130-sd1.pdf [file acel0014-0130-sd1.pdf]
